# Supplementary material for: Evolutionarily conserved properties of CLCA proteins 1, 3 and 4, as revealed by phylogenetic and biochemical studies in avian homologues
Source: PubMed Central journal article supplement (PMC9007345; doi:10.1371/journal.pone.0266937), 2022-04-13

## S6 original blots

**Figure 4:** Cell lysates from cells transfected with gCLCA1, gCLCA1EQ and EYFP-mock plasmids

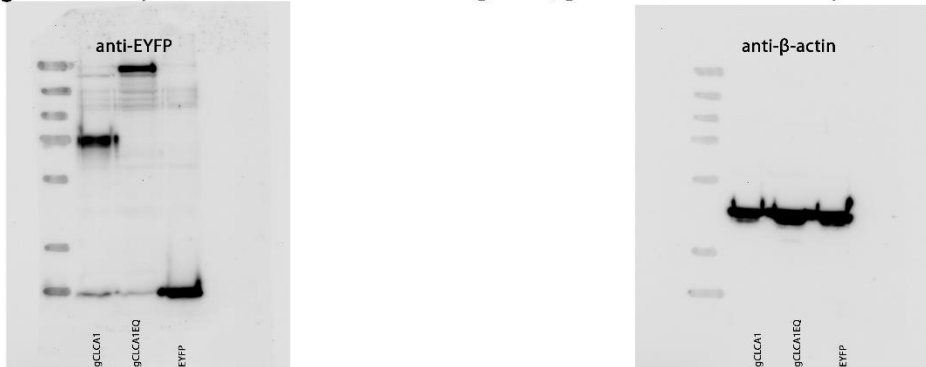

**Figure 5:** Cell lysates from cells transfected with gCLCA1, gCLCA1EQ, mCLCA1, mCLCA1EQ, mCLCA4a, mCLCA4aEQ, pcDNA-mock and EYFP-mock plasmids

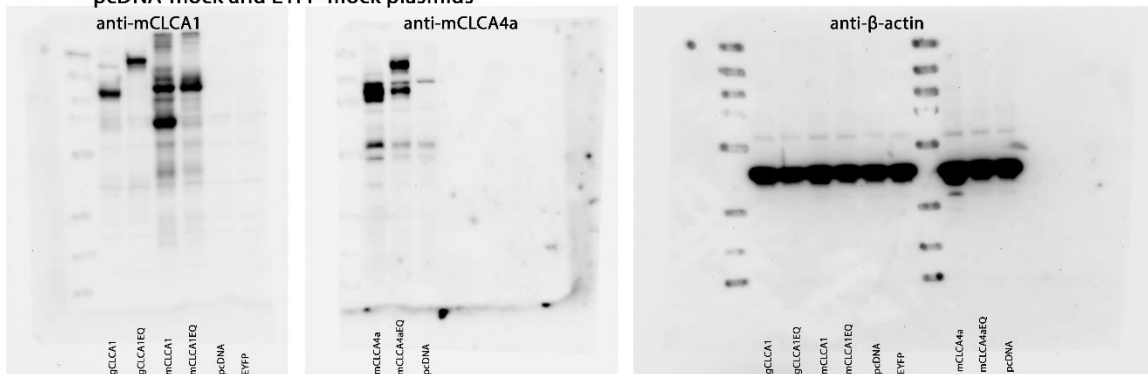

**Figure 6:** Cell lysate (L) and supernatant (S) from cells transfected with gCLCA1Nmbc1 and EYFP-mock plasmids

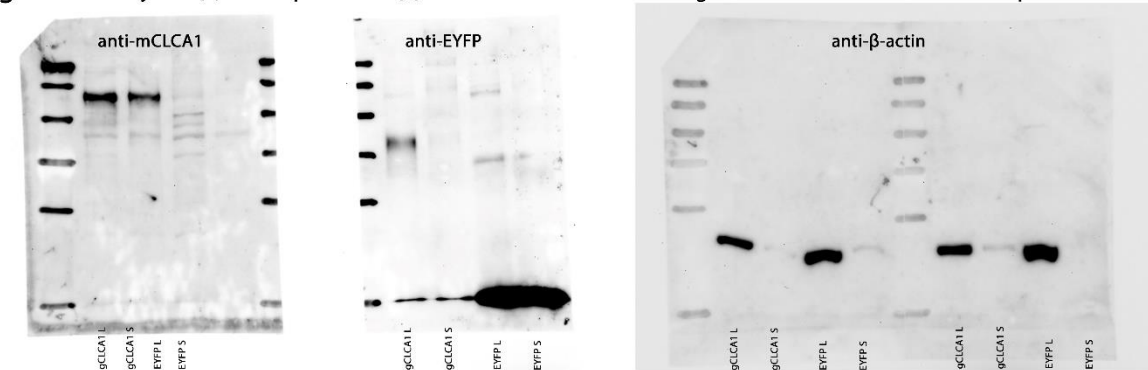

**Figure 7:** Cell lysate from cells transfected with gCLCA1Nmbc1 and EYFP-mock plasmids treated with endo H (H) or PNGase F (F) or left untreated (U)

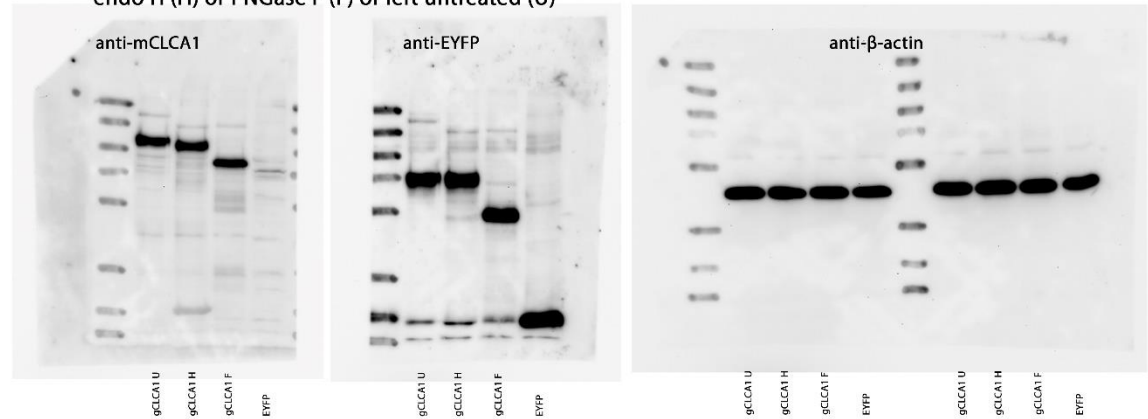

Supplement: pone.0266937.s008.pdf [file pone.0266937.s008.pdf]
